# Supplementary material for: Structure and emission studies of dimorphic crystals of [PtBr2(5,5′-bis(CF3CH2OCH2)-2,2′-bpy)] (1)
Source: Royal Society of Chemistry journal article supplement (doi:10.1039/c3dt52713a), 2013-11-11
Supplement: c3dt52713a.pdf [file c3dt52713a.pdf]

# Structure and Emission Studies of Dimorphic Crystals of [PtBr<sub>2</sub>(5,5'-bis(CF<sub>3</sub>CH<sub>2</sub>OCH<sub>2</sub>)-2,2'-bpy)](1)<sup>†</sup>

Norman Lu,<sup>\*,a,b</sup> Lauren M. Hight,<sup>b</sup> David R. McMillin,<sup>\*,b</sup> Jun-Wei Jhuo,<sup>a</sup> Wei-Cheng Chung,<sup>a</sup>  
Kwan-Yu Lin,<sup>a</sup> Yuh-Sheng Wen<sup>c</sup> and Ling-Kang Liu<sup>\*,c</sup>

## Table of Contents

|              |       |
|--------------|-------|
| 1. Figure S1 | ESI 1 |
| 2. Figure S2 | ESI 2 |
| 3. Figure S3 | ESI 3 |
| 4. Table S1  | ESI 3 |
| 5. Table S2  | ESI 4 |
| 6. Table S3  | ESI 4 |

### 1.

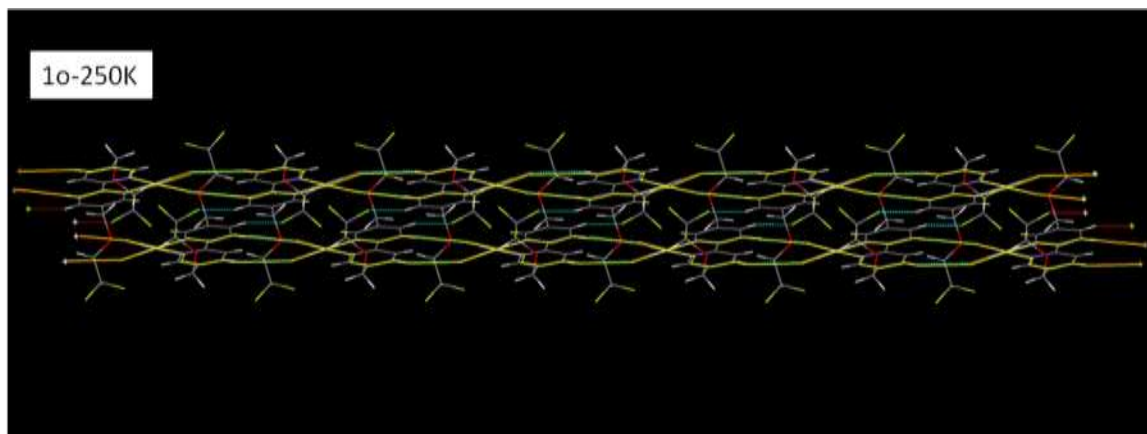

**Figure S1.** A better pictorial view of a double belt, which is highlighted by a yellow line, for **1o** at 250K; A closely packed pair of **1o** exhibiting Br, Br'...H3, H4' short contacts to molecules next on the belt and H4...F-C short contacts to molecules next on the opposite belt; [Note: Pt: purple; O: red; C: gray; H: white; F: yellow; Br: brown; Schematic drawing of complex **1** with labeling was shown in scheme A.]

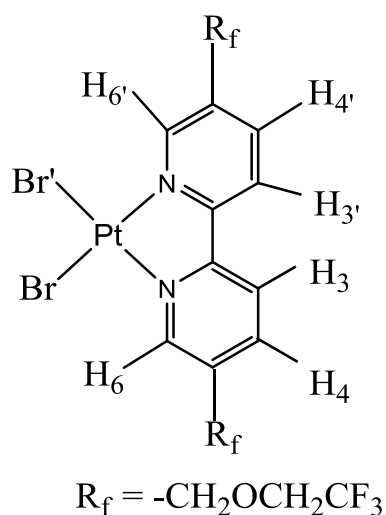

Scheme A schematic drawing of complex **1** (either **1o** or **1y**); [corresponding to the molecule located at the lower left corner and at the upper left corner in Figure S1 and Figure S2 (below), respectively.]

2.

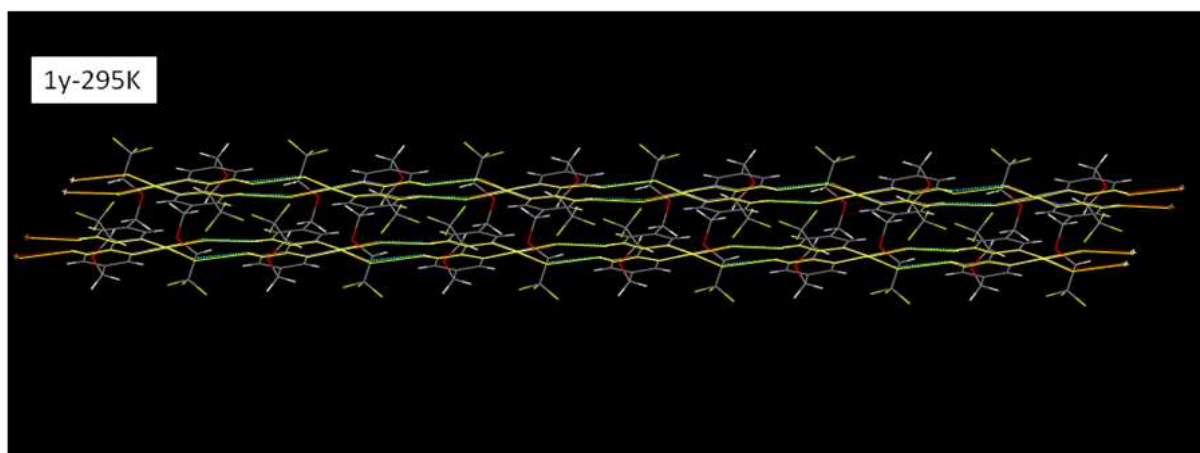

**Figure S2.** A pictorial view of a double belt, which is highlighted by a yellow line, for **1y** at 295K. A dimeric pair of **1y** exhibiting Br, Br'...H<sub>3</sub>, H<sub>3</sub>' short contacts to molecules next on the belt. [Note: Pt: purple; O: red; C: gray; H: white; F: yellow; Br: brown. The schematic drawing of the molecule located at the upper left corner is also shown in Scheme A.]

3.

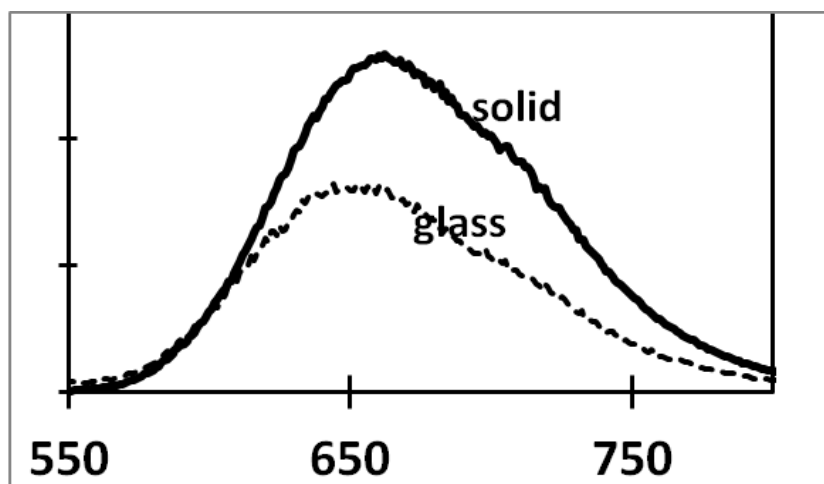

Figure S3. Emission spectra of [PtBr<sub>2</sub>bpy] in the solid state at 90 K (—) and glassy matrix in 1:1 DCM/toluene at 77K (---).

4.

Table S1. Dependence of unit cell parameters of the **1o** dimorph on temperature. The temperature was maintained at  $\pm 0.1$  K.

| Temp.<br>(K) | <i>a</i><br>(Å) | <i>b</i><br>(Å) | <i>c</i><br>(Å) | $\alpha$<br>(deg.) | $\beta$<br>(deg.) | $\gamma$<br>(deg.) | Volume<br>(Å <sup>3</sup> ) |
|--------------|-----------------|-----------------|-----------------|--------------------|-------------------|--------------------|-----------------------------|
| 295          | 7.1492(2)       | 9.2419(2)       | 15.9759(4)      | 95.290(1)          | 102.563(1)        | 93.596(1)          | 1022.17(4)                  |
| 250          | 7.1269(2)       | 9.2336(2)       | 15.9319(5)      | 95.597(1)          | 102.619(1)        | 94.175(1)          | 1013.42(5)                  |

Note: Full cif information of **1o** deposited at CDCC for both 295 and 250 K data.

5.

Table S2. Dependence of unit cell parameters of the **1y** dimorph on temperature. The temperature was maintained at  $\pm 0.1$  K.

| Temp.<br>(K) | a<br>(Å)  | b<br>(Å)  | c<br>(Å)   | alpha<br>(deg.) | beta<br>(deg.) | gamma<br>(deg.) | volume<br>(Å <sup>3</sup> ) |
|--------------|-----------|-----------|------------|-----------------|----------------|-----------------|-----------------------------|
| 295          | 7.6147(2) | 9.2829(2) | 15.1696(3) | 94.413(1)       | 99.808(1)      | 107.229(1)      | 999.91(4)                   |
| 200          | 7.5650(2) | 9.2677(2) | 15.0434(4) | 93.945(1)       | 100.345(1)     | 107.144(1)      | 983.10(4)                   |
| 150          | 7.5396(2) | 9.2604(3) | 14.9961(4) | 93.703(1)       | 100.584(1)     | 107.011(1)      | 976.35(5)                   |
| 125          | 7.5261(2) | 9.2596(3) | 14.9759(5) | 93.591(1)       | 100.702(1)     | 106.922(1)      | 973.51(5)                   |
| 100          | 7.5185(3) | 9.2611(3) | 14.9578(5) | 93.465(2)       | 100.823(1)     | 106.817(1)      | 971.91(6)                   |

Note: Full cif information of **1y** deposited at CDCC for temperatures ranging from 295 to 100 K.

6. Table S3. The Pt...Pt structural parameters at different temperatures for **1y** and **1o**

| Polymorph | Temp.<br>(K) | Pt(up)-Pt<br>(Å) | Pt-Pt(down)<br>(Å) | Pt(up)-Pt-Pt(down)<br>(deg.) |
|-----------|--------------|------------------|--------------------|------------------------------|
| <b>1y</b> | 295          | 3.5258(2)        | 4.7690(2)          | 132.72(1)                    |
|           | 200          | 3.5013(2)        | 4.7604(2)          | 132.01(1)                    |
|           | 150          | 3.4900(2)        | 4.7563(2)          | 131.60(1)                    |
|           | 125          | 3.4838(2)        | 4.7548(2)          | 131.37(1)                    |
|           | 100          | 3.4798(2)        | 4.7574(2)          | 131.15(1)                    |
| <b>1o</b> | 295          | 3.5903(2)        | 3.6186(2)          | 165.25(1)                    |
|           | 250          | 3.5792(4)        | 3.6110(4)          | 164.78(1)                    |
